# Supplementary material for: Cryogenic ion spectroscopy of adenine complexes containing alkali metal cations
Source: Royal Society of Chemistry journal article supplement (doi:10.1039/d1cp00312g), 2021-01-01

## **Supporting Information**

### **Cryogenic Ion Spectroscopy of Adenine Complexes**

#### **Containing Alkali Metal Cations**

Han Jun Eun, Shun-ich Ishiuchi, Ji Young Baek, Seulgi Lee, Jiyoung Heo, Masaaki Fujii,\*

and Nam Joon Kim\*

**Figure S1.** Optimized structures of low-lying isomers of (a)  $\text{Li}^+\text{A}$ , (b)  $\text{Na}^+\text{A}$ , (c)  $\text{Rb}^+\text{A}$ , and (d)  $\text{Cs}^+\text{A}$  predicted at the M06-2X/6-311++G(d,p) level. The numbers represent the relative energies in kJ/mol with zero-point energy corrections.

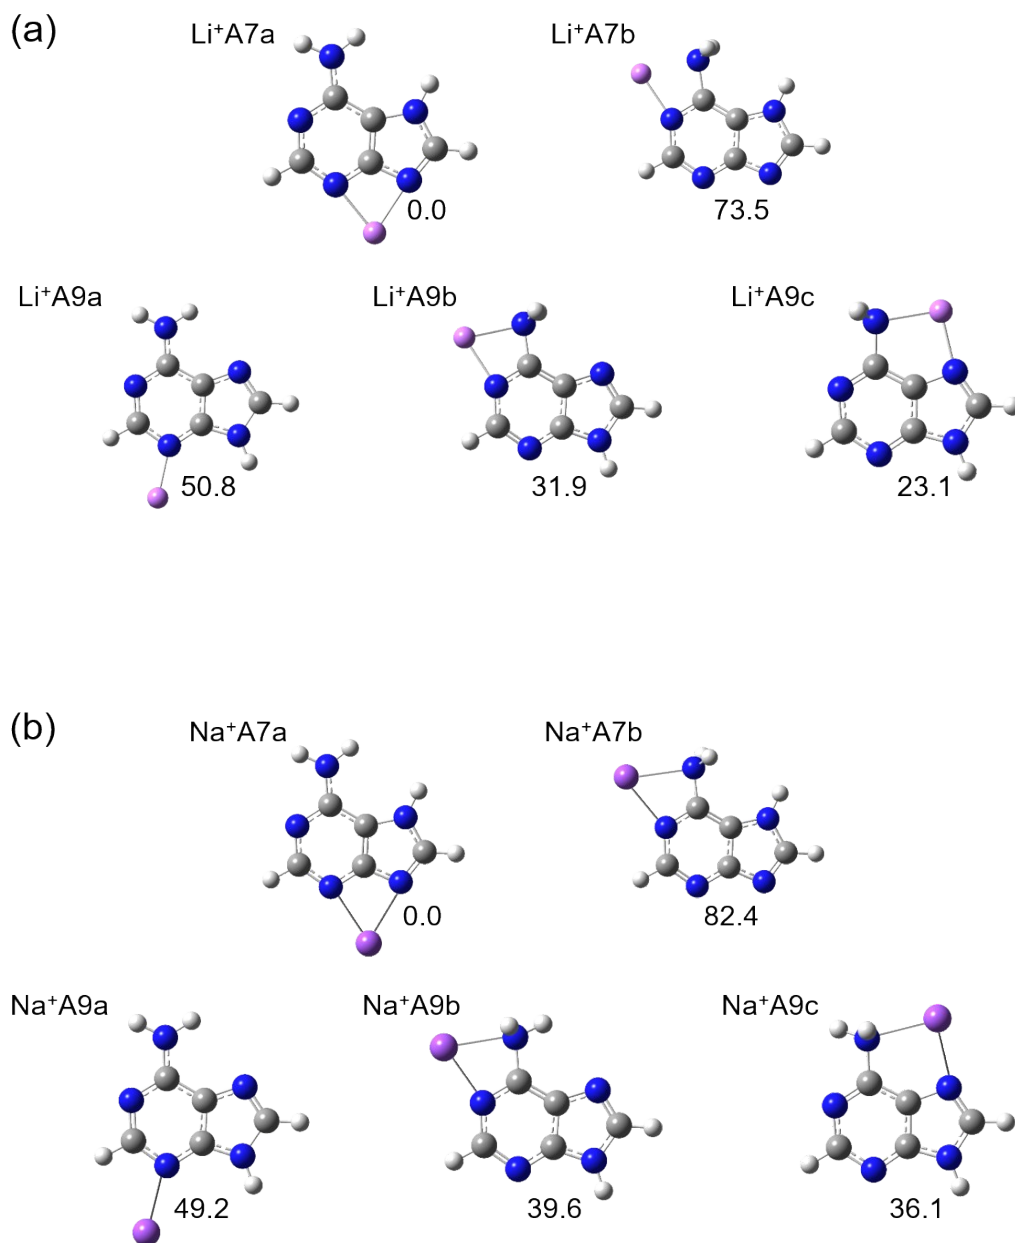

(c)

Rb<sup>+</sup>A7a

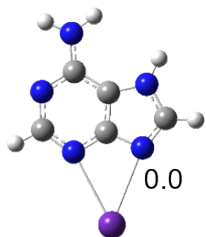

Rb<sup>+</sup>A7b

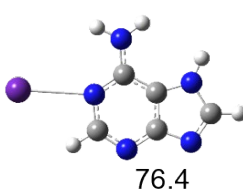

Rb<sup>+</sup>A9a

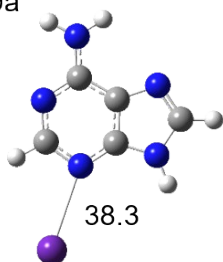

Rb<sup>+</sup>A9b

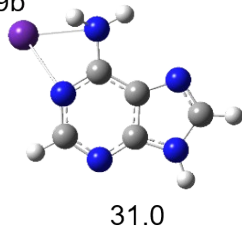

Rb<sup>+</sup>A9c

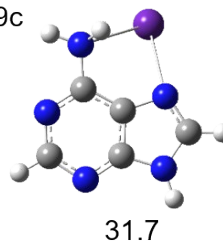

(d)

Cs<sup>+</sup>A7a

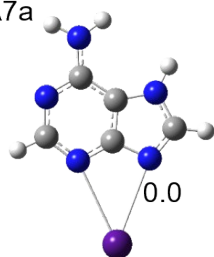

Cs<sup>+</sup>A7b

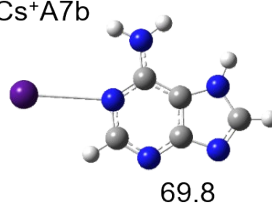

Cs<sup>+</sup>A9a

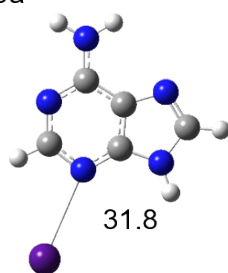

Cs<sup>+</sup>A9b

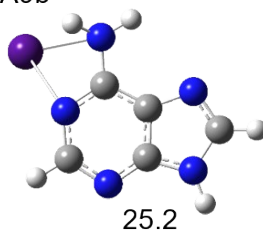

Cs<sup>+</sup>A9c

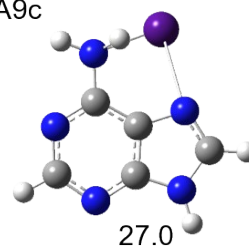

**Figure S2.** Theoretical IR spectra of low-lying isomers of (a)  $\text{Li}^+\text{A}$ , (b)  $\text{Na}^+\text{A}$ , (c)  $\text{Rb}^+\text{A}$ , and (d)  $\text{Cs}^+\text{A}$  predicted at the CAM-B3LYP/6-311++G(d,p) level with the scaling factor of 0.95. The IR ion-dip spectra of  $\text{M}^+\text{A}$  are shown at the top for comparison.

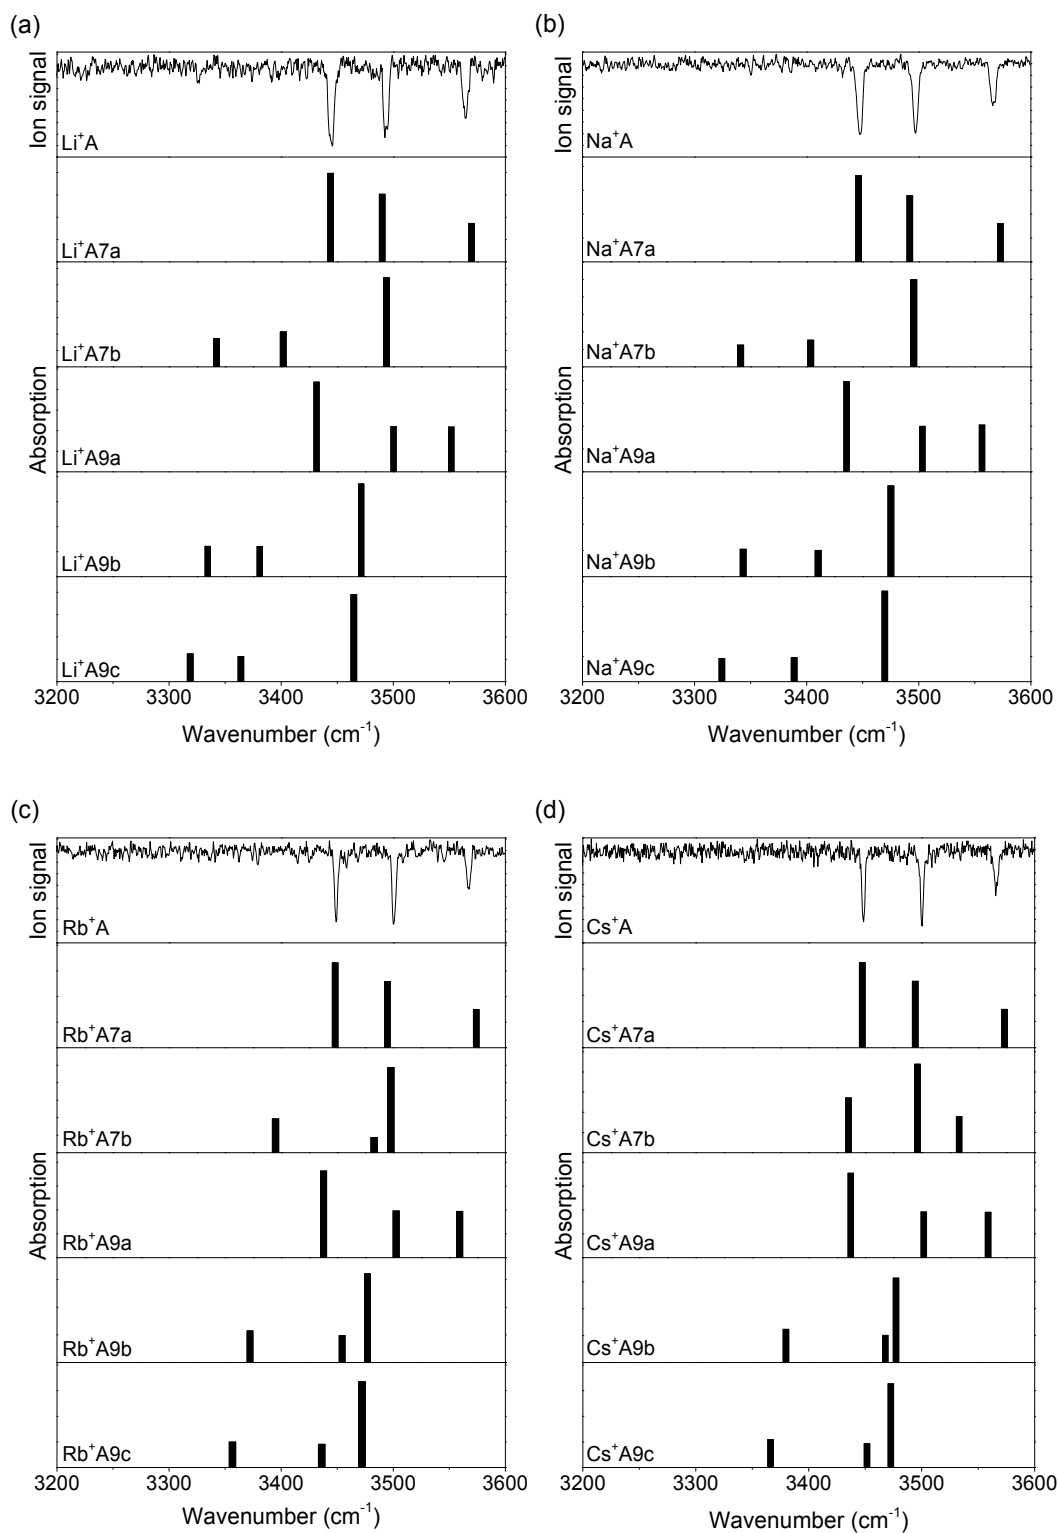

**Figure S3.** Electronic spectra of (a)  $\text{Li}^+\text{A7a}$ , (b)  $\text{Na}^+\text{A7a}$ , (c)  $\text{K}^+\text{A7a}$ , and (d)  $\text{Rb}^+\text{A7a}$  simulated using TDDFT at the M06-2X/6-311++G(d,p) level in consideration of Franck-Condon factors. The UVPD spectra of  $\text{M}^+\text{A}$  ions are shown at the top for comparison. The simulated electronic spectra of  $\text{M}^+\text{A9a}$  were not able to be obtained due to the dissociative nature of N3- $\text{M}^+$  bonds at the  $\text{S}_1$  state. The electronic spectrum of  $\text{Cs}^+\text{A7a}$  was not able to be simulated, possibly due to an error associated with the core potential basis set for Cs atom.

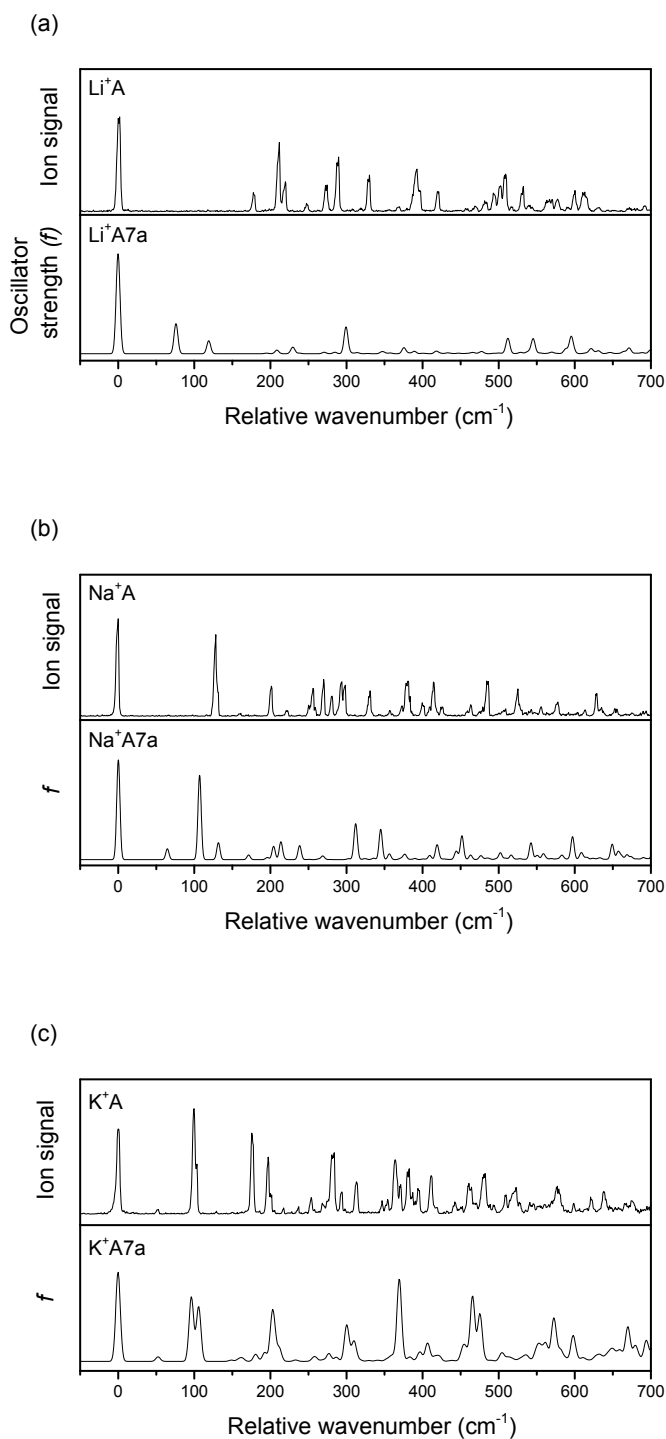

(d)

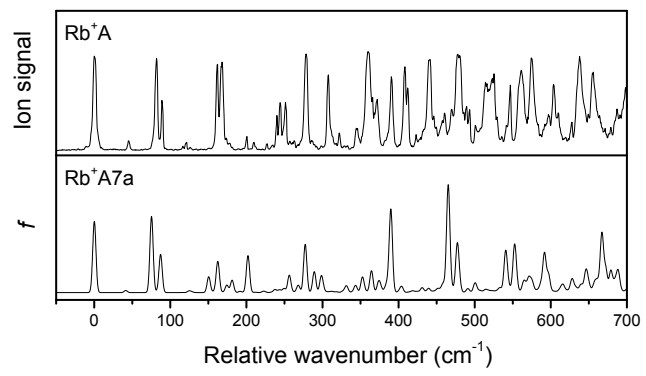

**Figure S4.** ESI mass spectrum of  $K^+A$  ions.

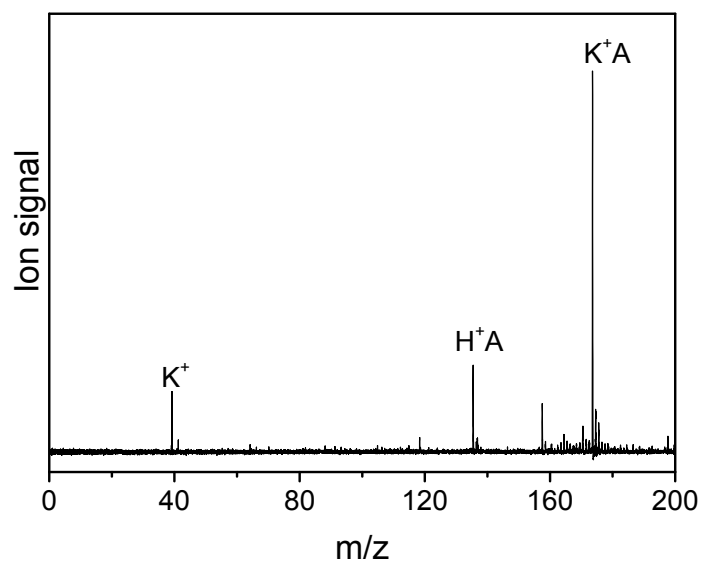

Supplement: d1cp00312g1.pdf [file d1cp00312g1.pdf]
